1 **A novel workflow to improve multi-locus genotyping of wildlife species: an**  
2 **experimental set-up with a known model system**

3  
4  
5  
6  
7  
8

Gillingham<sup>1</sup>, Mark A.F.; Montero<sup>1,2</sup>, B. Karina; Wilhelm<sup>1</sup>, Kerstin; Grudzus<sup>1</sup>, Kara; Sommer<sup>1</sup>, Simone;  
Santos<sup>1</sup>, Pablo S.C.

9 <sup>1</sup>*University of Ulm, Institute of Evolutionary Ecology and Conservation Genomics, Albert-Einstein-Allee*  
10 *11, 89069 Ulm, Germany [mark.gillingham@uni-ulm.de](mailto:mark.gillingham@uni-ulm.de) [kerstin.wilhelm@uni-ulm.de](mailto:kerstin.wilhelm@uni-ulm.de) [ulm.de](mailto:kara.grudzus@uni-</a></i><br/>11 <i><a href=) [simone.sommer@uni-ulm.de](mailto:simone.sommer@uni-ulm.de) [pablo.santos@uni-ulm.de](mailto:pablo.santos@uni-ulm.de)*

12 <sup>2</sup>*Zoological Institute, Animal Ecology & Conservation, Biocenter Grindel, Universität Hamburg,*  
13 *Hamburg, Germany [karina.montero@uni-hamburg.de](mailto:karina.montero@uni-hamburg.de)*

14  
15

16 **Keywords: open-source genotyping pipeline, ACACIA, next generation sequencing,**  
17 **amplicon genotyping, allele dropout, PCR amplification bias, sequencing bias, multigene**  
18 **family, MHC**

19

20 **Corresponding authors:**

21 Mark Gillingham and Pablo Santos  
22 Evolutionary Ecology and Conservation Genomics  
23 Albert-Einstein-Allee 11  
24 89069 Ulm  
25 Germany  
26 Phone: +49 731 50 22692  
27 e-mail: [mark.gillingham@uni-ulm.de](mailto:mark.gillingham@uni-ulm.de); [pablo.santos@uni-ulm.de](mailto:pablo.santos@uni-ulm.de)

## 28 **Abstract**

29 Genotyping novel complex multigene systems is particularly challenging in non-model  
30 organisms. Target primers frequently amplify simultaneously multiple loci leading to high PCR  
31 and sequencing artefacts such as chimeras and allele amplification bias. Most next-generation  
32 sequencing genotyping pipelines have been validated in non-model systems whereby the real  
33 genotype is unknown and artefacts generated may be highly repeatable. Further hindering  
34 accurate genotyping, the relationship between artefacts and copy number variation (CNV) within  
35 a PCR remains poorly described. Here we investigate the latter by experimentally combining  
36 multiple known major histocompatibility complex (MHC) haplotypes (chicken, *Gallus gallus*, 43  
37 artificial genotypes with 2-13 alleles per amplicon). In addition to well defined “optimal”  
38 primers, we simulated a non-model species situation by designing “naive” primers, with  
39 sequence data from closely related Galliform species. We applied a novel open-source  
40 genotyping pipeline (ACACIA) to the data, and compared its performance with another,  
41 previously published, pipeline. Finally, we applied ACACIA on a non-model system (grey-  
42 brown mouse lemurs, *Microcebus griseorufus*) with high CNV (MHC Class I exon 2 with up to  
43 11 loci). ACACIA yielded very high allele calling accuracy (>98%). Non-chimeric artefacts  
44 increased linearly with increasing CNV but chimeric artefacts leveled when amplifying more  
45 than 4-6 alleles. As expected, we found heterogeneous amplification efficiency of allelic variants  
46 when co-amplifying multiple loci. Using our validated ACACIA pipeline and the example data  
47 of this study, we discuss in detail the pitfalls researchers should avoid in order to reliably  
48 genotype complex multigene systems. ACACIA is publicly available at  
49 [https://gitlab.com/psc\\_santos/ACACIA](https://gitlab.com/psc_santos/ACACIA).

## 50 **Introduction**

51 A key challenge for molecular ecologists is that they frequently work on systems with limited to  
52 no knowledge of their genomes. This means that the development of a genotyping approach  
53 often relies on information from closely related species available in genetic databases.  
54 Furthermore, assessing and validating genotyping methods can be particularly challenging when  
55 the structure of the target region is unknown.

56 Multigene complexes, such as resistance genes (R-genes) and self-incompatibility genes  
57 (SI-genes) in plants, immunoglobulin superfamily and major histocompatibility genes (MHC) in  
58 vertebrates, and homeobox genes in animals, plants and fungi, among many others, are  
59 particularly challenging to genotype in non-model organisms. As a result of high sequence  
60 similarity from recent gene duplication events, polymerase chain reaction (PCR) primers will  
61 frequently bind across multiple loci leading to the amplification of multiple allelic variants  
62 (Babik, 2010; Biedrzycka et al., 2017; Burri et al., 2014; Lighten et al., 2014; Lighten,  
63 Oosterhout, & Bentzen, 2014; Sebastian et al., 2016; Sommer, Courtiol, & Mazzoni, 2013).  
64 Unspecific locus amplification may lead to several biases during PCR since 1) chimeric  
65 sequences (hereafter “chimeras”; which may arise because of incomplete extension of sequences  
66 during a PCR cycle which are subsequently completed with a different allele template) are likely  
67 to become more frequent as more loci are amplified within an amplicon simply because there  
68 will be more gene variants from which chimeric sequences can be generated (Lenz & Becker,  
69 2008); 2) amplification bias of some gene variants relative to others may occur because primers  
70 preferentially bind to some alleles/loci (hereafter referred to as “PCR competition”) (Marmesat et  
71 al., 2016; Sommer, Courtiol, & Mazzoni, 2013). Creative solutions in primer design and in PCR  
72 conditions, such as using pooled primers instead of degenerate primers (Marmesat et al., 2016),

73 reducing the number of cycles and modifying elongation steps of PCRs (Judo, Wedel, & Wilson,  
74 1998; Lenz & Becker, 2008; Smyth et al., 2010), can significantly reduce amplification bias.  
75 However, even after the application of such methods, PCR biases will nonetheless persist and  
76 may lead to genotyping errors because: 1) chimeric sequences may be difficult to distinguish  
77 from valid recombinant gene variants (frequent in multigene complexes; Chen et al., 2007),  
78 resulting either in PCR artefacts being falsely validated as a true allelic variants (type I errors,  
79 hereafter referred to as “false positives”) or in true allelic variants being falsely rejected as an  
80 artefact (type II errors, hereafter referred to as “allele dropout”) and 2) poorly amplified allelic  
81 variants may not be sequenced resulting in allele dropout, particularly when the number of  
82 sequences per amplicon (a set of sequences of a target region generated within a PCR) is low  
83 (Biedrzycka et al., 2017; Galan et al., 2010; Lighten et al., 2014; Lighten, Oosterhout, &  
84 Bentzen, 2014; Sommer, Courtiol, & Mazzoni, 2013).

85         The recent rapid dissemination of next generation DNA sequencing (NGS) platforms has  
86 provided molecular ecologists with an exciting opportunity to tackle the parallelized genotyping  
87 of multiple markers in numerous species, since it has allowed the generation of thousands of  
88 sequences (termed “reads”) per amplicon, at a fraction of cost and time needed previously  
89 (Babik, 2010; Sommer, Courtiol, & Mazzoni, 2013; Lighten et al., 2014). However, NGS  
90 platforms have their own limitations, the most relevant being the relatively high amount of  
91 sequencing errors generated in a typical sequencing run (Glenn, 2011; Huse et al., 2007;  
92 Sommer, Courtiol, & Mazzoni, 2013; Liu, Keller, & Heckel, 2012; McElroy, Luciani, & Thomas,  
93 2012; Ross et al., 2013). For instance, Illumina, currently the mainstream technology for NGS  
94 amplicon sequencing, report an error rate (primarily substitutions of base pairs) of  $\leq 0.1\%$  per  
95 base for  $\geq 75\text{-}85\%$  of bases (see Glenn (2011) for details), although final error rates are likely to

96 be much higher and can reach up to 6% (McElroy et al., 2012). Indeed, previous genotyping  
97 studies multi-locus-systems (>10) reported average amplification and sequencing artefact rates of  
98 1.5% to 2.5% per amplicon (Promerová et al., 2012; Radwan et al., 2012; Sepil et al., 2012).  
99 Therefore, PCR competition when amplifying multiple loci per amplicon means that sequences  
100 from some genuine allelic variants occur at a similar frequency to PCR artefacts or sequencing  
101 errors (Biedrzycka et al., 2017; Galan et al., 2010; Lighten, Oosterhout, & Bentzen, 2014;  
102 Sommer, Courtiol, & Mazzoni, 2013). In this scenario, poorly amplified alleles cannot be easily  
103 distinguished from artefacts during allele validation, leading to further false positives and allele  
104 dropout during genotyping.

105         The need to distinguish PCR and sequencing artefacts from valid allelic variants has led  
106 to the development of multiple bioinformatic workflows (i.e. a set of bioinformatic steps during  
107 processing of sequencing data which eventually leads to genotyping, hereafter referred to as a  
108 “genotyping pipeline”). While all genotyping pipelines rely to some degree on the assumption  
109 that artefacts are less frequent than genuine allelic variants, they vary in the approach used to  
110 discriminate poorly amplified allelic variants from artefacts. Genotyping pipelines for complex  
111 gene families have been extensively reviewed in Biedrzycka et al. (2017). Recently developed  
112 pipelines cluster artefacts to their putative parental sequences thereby increasing the read depths  
113 of true variants (Lighten et al., 2014; Pavey et al., 2013; Sebastian et al., 2016; Stutz & Bolnick,  
114 2014). Currently, the most commonly used pipeline for MHC studies is the AmpliSAS web  
115 server pipeline (Sebastian et al., 2016). After chimera removal, AmpliSAS uses a clustering  
116 algorithm to discriminate between artefacts and allelic variants, which take into account the error  
117 rate of a particular NGS technology and the expected lengths of the amplified sequences. This is  
118 achieved in a stepwise manner, whereby it first clusters the most common variant (according to

119 specified error rates) and then moves on to the next most common variant, until no variant  
120 remains to be clustered. Microbiome studies, which typically amplify hypervariable regions of  
121 the 16S rRNA gene from very diverse bacterial communities within a single amplicon, have used  
122 a similar strategy to AmpliSAS, whereby potential artefactual variants are clustered to suspected  
123 parental sequences using Shannon entropy (referred to as “Oligotyping”; Eren et al., 2013) or  
124 other similar clustering methods (Amir et al., 2017; Callahan et al., 2016).

125       Most of the amplicon genotyping pipelines for multigene families available to molecular  
126 ecologists have only been tested on non-model organisms for which the real genotype is  
127 unknown (but see Sebastian et al., 2016). As a consequence, studies have frequently depended on  
128 repeatability of duplicated samples to justify genotyping pipeline reliability (Biedrzycka et al.,  
129 2017; Galan et al., 2010; Lighten et al., 2014; Radwan et al., 2012; Sebastian et al., 2016;  
130 Sommer, Courtiol, & Mazzoni, 2013). However for a given set of PCR primers and sequencing  
131 technology, PCR and sequencing bias, and thus in turn the rate of false positives and allele  
132 dropout, will be consistently repeatable (Biedrzycka et al., 2017). For instance, the high rate of  
133 Illumina substitution errors are known to be not random (see references within Sebastian et al.,  
134 2016) and therefore variants which result from substitution errors are highly repeatable between  
135 amplicons (Biedrzycka et al., 2017). Furthermore, while the generation of PCR and sequencing  
136 artefacts is well known, the precise relationship between artefacts and the number of alleles  
137 amplified within an amplicon for a given set of primers and sequencing technology has never  
138 been described. Yet, having a clear indication of this relationship is an important step in  
139 predicting what are the optimal pipelines settings (e.g. predicting error rates) for a given number  
140 of loci amplified within an amplicon. The latter can only be achieved by experimentally  
141 manipulating CNV of *a priori* known genotypes before PCR amplification and NGS sequencing.

142           In this study, we manipulated known combinations of the MHC alleles of a model  
143 organism (the chicken, *Gallus gallus*) as an example of a target multigene region of interest to  
144 molecular ecologists, in order to accurately quantify the effects of PCR and sequencing artefacts  
145 on genotyping pipelines. While we focus on the MHC hereafter, all methods and results are  
146 applicable to any multigene family. Like many multigene complexes, MHC genes are subject to  
147 multiple gene conversion, duplication and deletion (Nei, Gu, & Sitnikova, 1997; Nei & Rooney,  
148 2005; Parham & Ohta, 1996) and MHC gene copies vary considerably across and even within a  
149 species (reviewed in Kelley, Walter, & Trowsdale, 2005). Therefore, the number of MHC loci  
150 present in a non-model study system often remains unknown. For instance, MHC Class IIB CNV  
151 was found to be as high as 21 in some passerine species, resulting in up to 42 allelic variants  
152 amplified within an amplicon and strong CNV between individuals (Biedrzycka et al., 2017). In  
153 contrast, the chicken MHC B complex is unusually simple, leading it to be coined as a “minimal  
154 essential” system, with only two MHC Class I loci and two MHC Class II loci (Kaufman, Jacob,  
155 et al., 1999; Kaufman, Milne, et al., 1999; Kaufman, Völk, & Wallny, 1995). The latter is  
156 therefore an ideal system to validate MHC genotyping pipelines for the following reasons: 1.) the  
157 structure of the B complex is well known with well-defined primers in conserved regions; 2.) the  
158 well characterized B complex haplotype lineages can be used so that the expected MHC  
159 genotyping results are known prior to sequencing and genotyping and 3.) CNV within an  
160 amplicon can be experimentally engineered by combining DNA samples from multiple MHC B  
161 complex haplotypes.

162           In order to perform the genotyping of known chicken MHC haplotypes and extract data  
163 concerning PCR and sequencing artefacts at each step of the genotyping workflow, we  
164 developed and calibrated our own genotyping pipeline (named ACACIA for Allele CALLing

165 proCedure for Illumina Amplicon sequencing data). We experimentally generated a MHC  
166 dataset with a range of CNVs by combining DNA samples from multiple chicken MHC B  
167 complex haplotypes. Since MHC B complex in chickens is well characterised, optimal primers to  
168 amplify the entire exons which code for the antigen binding regions have been developed within  
169 the introns (Goto et al., 2002; Shaw et al., 2007). However in most wildlife species, such  
170 extensive genomic information around the region of interest is unavailable. To replicate the  
171 challenge of designing primers for a non-model species, we additionally designed primers within  
172 the exons coding for antigen-binding regions using sequence data from closely related Galliform  
173 species that were not chickens (hereafter referred to as “naïve primers”). The latter enabled us to  
174 test and quantify the relative amount of artefacts generated by naïve primer design as compared  
175 to optimal primers. We further tested our pipeline on a non-model system (an MHC Class I  
176 dataset from grey-brown mouse lemurs, *Microcebus griseorufus*) which varied significantly in  
177 CNV (up to 11 loci with considerable CNV).

178 Specifically, this study aimed to:

- 179 1. validate ACACIA using experimentally manipulated genotypes with different CNV that  
180 are known *a priori*;
- 181 2. accurately describe the relationship between PCR/sequencing artefacts and CNV by  
182 experimentally varying CNV and primer design in a model system;
- 183 3. test ACACIA in wildlife species with unknown genotypes of varying CNV (within and  
184 between species).



## 185 **Materials and Methods**

### 186 *Samples and DNA extraction*

187 Chicken blood samples originated from experimental inbred lines kept at the Institute for Animal  
188 Health at Compton UK (lines 7<sub>2</sub>, C, WL and N) and the Basel Institute for Immunology in Basel  
189 Switzerland (lines H.B15 and H.B19+), as discussed (Jacob et al., 2000; Shaw et al., 2007;  
190 Wallny et al., 2006). These lines carry seven common B haplotypes: B2 (line 7<sub>2</sub>), B4 and B12  
191 (line C), B14 (line WL, sometimes referred as W), B15 (H.B15), B19 (H.B19) and B21 (line N).  
192 All the lines are homozygotes at the MHC except line C, which was not used in this study. In  
193 each haplotype are two class II B loci: BLB1 (previously known as BLBI or BLBminor) and  
194 BLB2 (BLBII or BLBmajor), with alleles now designated as BLB1\*02 and BLB2\*02 from the  
195 B2 haplotype, etc. All alleles have different nucleotide sequences, except BLB1\*12 and  
196 BLB1\*19. DNA was isolated from blood cells by a salting out procedure (Miller, Dykes, &  
197 Polesky, 1988).

198

199 Grey-brown mouse lemurs were caught in Tsimanampetsotsa National Park in  
200 southwestern Madagascar. Field work was conducted between 2013 and 2015 following an  
201 established trapping protocol described in detail in Scheel et al. (2015). Genomic DNA was  
202 isolated from ear biopsies preserved in 70% ethanol. We performed DNA extractions using the  
203 DNeasy Blood and Tissue Kit (Qiagen, Valencia, CA, USA).

204

### 205 *Generating 41 artificial MHC genotypes*

206 We artificially generated 43 genotypes of varying CNV by combining equimolar amounts of  
207 DNA samples from the seven MHC haplotypes mentioned above (Table 1; created genotypes  
208 listed in Supplementary Table 1).

209

#### 210 *Optimal primers for chicken MHC Class II*

211 We targeted the entire 241 bp of exon 2 of MHC Class II, the polymorphic region known to code  
212 for antigen binding sites, using the primers OL284BL (5'-GTGCCCCGACGCGTTCTTC-3') and  
213 RV280BL (5'-TCCTCTGCACCGTGAAGG-3'; Goto et al., 2002). The primers are not locus  
214 specific and bind to both loci of the chicken B complex.

215

#### 216 *Naïve primer design for chicken MHC Class II*

217 In order to naïvely design primers, we downloaded 61 exon 2 MHC Class II sequences from  
218 seven Galliform species (*Coturnix japonica*, *Crossoptilon crossoptilon*, *Meleagris gallopavo*,  
219 *Numida meleagris*, *Pavo cristatus*, *Perdix perdix* and *Phasianus colchicus*) from the GenBank  
220 (<https://www.ncbi.nlm.nih.gov/genbank/>). We then used Primer3 (Rozen & Skaletsky, 1999;  
221 Untergasser et al., 2012) to design the forward primer GagaF1 (5'-  
222 WTCTACAACCGGCAGCAGT-3') and the reverse primer GagaR2 (5'-  
223 TCCTCTGCACCGTGAWGGAC-3') aiming at amplifying 151 bp of exon 2.

224

#### 225 *MHC Class I primer design of the grey-brown mouse lemur*

226 Target-specific primers (MHCI-W04F: 5'CCCAGGCTCCCACTCCCT-3' and MHCI-W04R: 5'-  
227 GCGTCGCTCTGGTTGTAGT-3') were designed to flank the classical MHC class I exon 2 gene  
228 W04 (fragment length = 236 bp), previously described as a functional gene coding for antigen-  
229 binding sites (Averdam et al., 2009; Flügge et al., 2002). We designed primers from the

230 consensus sequence of the MHC class I gene from three primate species deposited in GenBank:  
231 grey mouse lemur (*Microcebus murinus*, accession numbers FP236833, AJ302085, AJ297588-  
232 AJ297590), ring-tailed lemur (*Lemur catta*, KC506599, AB098452), and rhesus monkey  
233 (*Macaca mulatta*, NM\_001048245).

234

### 235 *PCR Amplification, Library Preparation, and High-Throughput Sequencing*

236 For all datasets we replicated all individuals in order to estimate repeatability ( $n_{individuals} = 43$  and  
237  $n_{amplicons} = 86$  for the chicken datasets; and,  $n_{individuals} = 147$  and  $n_{amplicons} = 294$  for the grey-  
238 brown lemur dataset).

239 Individual PCR reactions were tagged with a 10-base pair identifier, using a standardized  
240 Fluidigm protocol (Access Array™ System for Illumina Sequencing Systems, ©Fluidigm  
241 Corporation). We first performed a target specific PCR with the CS1 adapter and the CS2  
242 adapter appended. To enrich base pair diversity of our libraries during sequencing, we added four  
243 random bases to our forward primer. The CS1 and CS2 adapters were then used in a second PCR  
244 to add a 10bp barcode sequence and the adapter sequences used by the Illumina instrument  
245 during sequencing.

246 For the chicken datasets, the first PCR consisted of 3–5 ng of extracted DNA, 0.5 units  
247 FastStart Taq DNA Polymerase (Roche Applied Science, Mannheim, Germany), 1x PCR buffer,  
248 4.5 mM MgCl<sub>2</sub>, 250 μM each dNTP, 0.5 μM primers, and 5% dimethylsulfoxide (DMSO). The  
249 PCR was carried out with an initial denaturation step at 95°C for 4 min followed by 30 cycles at  
250 95°C for 30 s, 60°C for 30 s, 72°C for 45 s, and a final extension step at 72°C for 10 min. The  
251 second PCR contained 2 μl of the product generated by the initial PCR, 80 nM per barcode  
252 primer, 0.5 units FastStart Taq DNA Polymerase, 1x PCR buffer, 4.5 mM MgCl<sub>2</sub>, 250 μM each

253 dNTP, and 5% dimethylsulfoxide (DMSO) in a final volume of 20  $\mu$ l. Cycling conditions were  
254 the same as those outlined above but the number of cycles was reduced to ten.

255 For the grey-brown mouse lemurs the first PCR round was carried out in a 10- $\mu$ l reaction  
256 volume, including 1  $\mu$ l DNA template, 0.5  $\mu$ M primers, 1  $\mu$ l GC enhancer and 1 unit AmpliTaq  
257 Gold 360 Master Mix. PCR cycling included an activation step at 95°C for 10 min followed by  
258 25 cycles consisting of a denaturation step at 95 °C for 30 s, annealing at 64 °C for 30 s and  
259 extension at 72 °C for 60 s. A final extension step was omitted to reduce artefact formation  
260 (Smyth et al., 2010). The second PCR contained 2  $\mu$ l of the product generated by the initial PCR,  
261 1  $\mu$ l GC enhancer, 80 nM per barcode primer and 0.5 units AmpliTaq Gold 360 Master Mix in a  
262 final volume of 20  $\mu$ l. Cycling conditions were the same as those outlined above but the number  
263 of cycles was reduced to seven.

264 PCR products were purified using an Agilent AMPure XP (Beckman Coulter) bead  
265 cleanup kit. The fragment size and DNA concentration of the cleaned PCR products were  
266 estimated with the QIAxcel Advanced System (Qiagen) and by UV/VIS spectroscopy on an  
267 Xpose instrument (Trinean, Gentbrugge, Belgium). Samples were then pooled to equimolar  
268 amounts of DNA. The library was prepared as recommended by Illumina (Miseq System  
269 Denature and Dilute Libraries Guide 15039740 v05) and was loaded at 7.5 pM on a MiSeq flow  
270 cell with a 10% PhiX spike. Paired-end sequencing was performed over 2  $\times$  251 cycles.

271

## 272 *Data analysis with the ACACIA pipeline*

273 ACACIA is written in Python 2.7 and consists of 11 consecutive steps of data processing. One  
274 dedicated script performs the administration of all commands, handles data from one step to the

275 next and gathers information along the way. ACACIA uses a total of seven external programs  
276 (described below) within its workflow.

277 1. **Generating Quality Reports.** Sequencing quality is assessed for each FASTq file yielded by  
278 the sequencing platform, with the FastQC tool  
279 ([www.bioinformatics.babraham.ac.uk/projects/fastqc/](http://www.bioinformatics.babraham.ac.uk/projects/fastqc/)). Visual reports for each file are  
280 produced as an output.

281 2. **Trimming of low quality ends of forward and reverse reads.** The information generated in  
282 step #1 is crucial for an informed decision about how many (if any) bases should be trimmed  
283 out of each read. If trimming is performed, new quality reports are generated as in step #1,  
284 and step #2 can be repeated. FASTq files are generated as an output.

285 3. **Merging of paired-end reads.** This step is for projects with paired-end sequencing only, and  
286 users can skip this step if using data from single-end sequencing (Note: the name of the  
287 matching forward and reverse FASTq files should be identical prior to the first “\_”, e.g.:  
288 File1\_S1\_L001\_R1\_001.fastq and File1\_S1\_L001\_R2\_001.fastq). The reads of these files  
289 are merged using FLASH (Magoč & Salzberg, 2011). The minimum and maximum lengths of  
290 overlap during merging can be changed by the user (defaults are zero and the length of the  
291 reads) (Magoč & Salzberg, 2011). As an output, FASTq files with merged sequences are  
292 generated, as well as a series of monitoring (log) files that allow users to check merging  
293 performance.

294 4. **Primer trimming.** After prompting users to enter the sequences of the primers used for  
295 amplicon sequencing, ACACIA searches the oligos at both ends of the merged sequences  
296 (IUPAC nucleotide ambiguity codes are allowed). When a perfect match for both primers is

297 found, they are trimmed and new, primer-less sequences, are written into FASTq files which  
298 are the output of this step.

299 5. **Quality-control filter.** Users are then prompted to enter the values of two parameters ( $q$  and  
300  $p$ ) to filter sequences based on their phred-score quality flags. First,  $q$  stands for *quality* and  
301 denotes a phred-score threshold that can take values from 0 to 40. Second,  $p$  stands for  
302 *percentage* and denotes the proportion of bases, in any given sequence, that need to achieve  
303 at least the quality threshold  $q$  for that sequence to pass the quality filter. ACACIA uses the  
304 default values  $q = 30$  and  $p = 90$  if users do not explicitly change them. In practical terms,  
305 this threshold combination corresponds to an error probability lower than  $10^{-3}$  in at least 90%  
306 of bases for each sequence. All quality scores of sequences passing this filter are removed to  
307 decrease file sizes and FASTA files with high-quality sequences are given as output.

308 6. **Singleton removal.** A large proportion of sequences contain random errors inherent to the  
309 sequencing technology (Quail et al., 2012). In order to decrease file sizes without risking loss  
310 of relevant allele information, ACACIA removes all singletons (sequences that appear one  
311 single time) in an individual amplicon.

312 7. **Chimera removal.** The chimera identification tool VSEARCH (Rognes et al., 2016) is  
313 employed here, with slightly altered settings ( $alignwidth = 0$  and  $mindiffs = 1$ ) aiming at  
314 increasing sensitivity to chimeras that diverge very little from one of the “parent” sequences.  
315 FASTA files with non-chimeric sequences, along with log files for each individual amplicon,  
316 are given as output.

317 8. **Removal of unrelated sequences.** A local BLAST tool (Altschul et al., 1990) is used in this  
318 step in order to compare all sequences with a set of reference sequences chosen by users.  
319 This steps aims at removing sequences that passed all filters so far but are products of

320 unspecific priming during PCR. Typically, reference sequences can be downloaded from  
321 GenBank ([www.ncbi.nlm.nih.gov/genbank/](http://www.ncbi.nlm.nih.gov/genbank/)) depending on the gene family and taxonomy  
322 relevant for each project. Users are prompted to provide one FASTA file with reference  
323 sequences, which is converted to a local BLAST database and used for the BLAST search.  
324 Only sequences yielding high-scoring hits to the database (expectation value threshold = 10)  
325 are written into new FASTA files as an output of this step. This is the workflow's last  
326 filtering step.

327 9. **Aligning.** The MAFFT aligner (Kato & Standley, 2013) is used to perform global alignment  
328 of sequences that have passed all filters. Since all sequences are pooled into one single  
329 alignment output file, the individual IDs are now transferred from file names into the FASTA  
330 sequence headers. We have successfully aligned up to 603,513 sequences in a desktop  
331 computer of eight cores and 32GB of RAM. Users with a significantly higher number of  
332 sequences might find it useful to increase parallelization of the aligner as described recently  
333 (Nakamura et al., 2018).

334 10. **Entropy analysis and calling of candidate alleles.** The Oligotyping tool (Eren et al., 2013)  
335 is used here to call candidate alleles. This step consists of concatenating high-information  
336 nucleotide positions (defined by entropy analysis of the alignment produced in the previous  
337 step) and subsequently using entropy information to cluster divergent variants, while  
338 grouping redundant information and filtering out artefacts. Although Oligotyping is  
339 conceived as a supervised tool, we automated the selection of parameter values aiming at  
340 high tolerance. This has the advantage of running Oligotype unsupervised as a pipeline step,  
341 at the cost of keeping potential false positives among the results. Report files with a list of  
342 candidate alleles grouped by individual amplicon are the output of this step. The automation

343 of parameter values is accomplished by a Python script that considers the number of  
344 sequences present in the alignment. Although originally conceived as a tool for identifying  
345 variants from microbiome 16S rRNA amplicon sequencing projects, Oligotyping is also ideal  
346 for other forms of highly variable amplicon sequencing projects.

347 **11. Allele Calling.** A Python script is used to perform the final allele calling by filtering out  
348 Oligotyping results according to the following criteria:

- 349 ○ Removal of unique allele variants (Y/N). Setting Y (yes) removes all alleles  
350 identified in one single individual amplicon.
- 351 ○ Absolute number of reads (abs\_nor): minimum number of sequences that need to  
352 support an allele, otherwise the allele is considered an artefact. Ranges between 0  
353 and 1000, with default = 10.
- 354 ○ Lowest proportion of reads (low\_por): in order to be called in an individual  
355 amplicon, an allele needs to be supported by at least the proportion of reads,  
356 within that individual amplicon, that is declared here. Ranges between 0 and 1  
357 with default = 0, but 0.01 is recommended for large data sets, which can suffer  
358 more from false positives (Biedrzycka et al., 2017).

359  
360 Subsequently, putative alleles with very low frequency (both at the individual and population  
361 level) are scrutinized once again. If the proportion of reads of a putative allele within an  
362 individual amplicon is less than 10 times lower than the next higher ranking allele, and if it is  
363 very similar (one single different base) to another, more frequent allele present in the same  
364 individual amplicon, that putative allele is considered an artefact and removed. Finally, if an  
365 individual amplicon has fewer than 50 sequences following all of the allele calling validation  
366 steps, it is eliminated. Before ACACIA assigns names to alleles, users are asked to provide a  
367 FASTA file with previously known names and sequences of alleles to be taken into  
368 consideration while assigning names. Users are able to change all parameter values, but



369 ACACIA recommends settings based on our benchmarking. The output of this step consists  
370 of four files:

- 371 ○ allelereport.csv: a brief allele report listing genotypes of all individual amplicons  
372 as well as frequencies and abundances of all alleles found in the run;
- 373 ○ allelereport\_XL.csv: a detailed allele report including the number of reads  
374 supporting each allele both within individuals and in the population;
- 375 ○ alleles.fasta: a FASTA sequence file of all alleles identified in the run;
- 376 ○ pipelinereport.csv: a pipeline report quantifying reads and sequences failing  
377 and/or passing each pipeline step described above.

378

### 379 *Data analysis with the AmpliSAS pipeline*

380 To compare how ACACIA performed relative to an existing relevant pipeline, we applied the  
381 web server AmpliSAS pipeline to our chicken datasets (Sebastian et al., 2016). The default  
382 AmpliSAS parameters of a substitution error rate of 1% and an indel error rate of 0.001% for  
383 Illumina data was used. We then tested for the optimal ‘minimum dominant frequency’  
384 clustering threshold for a given filtering threshold (i.e. 0.5% for the ‘minimum amplicon  
385 frequency’), by testing a clustering threshold of 10%, 15%, 20% and 25%. All clustering  
386 parameters tested gave an allele calling accuracy of ~97%, but we chose the 25% clustering  
387 threshold because it was the only parameter which resulted in no false positives.

388 Subsequently, AmpliSAS filters for clusters that are likely to be artefacts, including  
389 chimeras and other low frequency artefacts that have filtered through the clustering step  
390 (Sebastian et al., 2016). The default setting for the filtering of low frequency variants (i.e.  
391 ‘minimum amplicon frequency’) is 3%. However this value was much too high for our datasets,  
392 and we tested a range of filtering threshold between 0% and 1% at 0.1% intervals (i.e. 0%, 0.1%,  
393 0.2% etc., supplementary Figure S1). We found that the optimal threshold for the AmpliSAS

394 filtering step for the optimal primer chicken dataset was 0.3% (Figure S1), whilst we found  
395 higher allele calling accuracy with a filter threshold of 0.5% for the naïve primers dataset.

## 396 **Results**

### 397 *Sequencing depth for each dataset and proportion of artefacts detected using ACACIA*

398 A total of 530,101 paired-end reads were generated for the chicken optimal primers dataset,  
399 which amounted to an average of 6,164 reads per amplicon ( $n = 86$ ). For the naïve primers  
400 dataset, 994,338 paired-end reads were generated, amounting to an average of 11,562 reads per  
401 amplicon ( $n = 86$ ). The proportion of artefacts identified at each step of the ACACIA pipeline for  
402 the chicken datasets combined is illustrated in Figure 1. Workflow filtering removed the highest  
403 proportion of reads when filtering for singletons (13.6%) and chimeras (14.2%). After all filters,  
404 66.4% of the original raw reads were used for allele calling. Finally for the MHC Class I exon 2  
405 grey-brown mouse lemur dataset, a total of 15,050,630 reads were generated which amounted to  
406 an average of 51,192 reads per amplicon ( $n = 294$ ). All negative controls ( $n = 2$  chicken optimal  
407 primer;  $n = 2$  chicken naïve primer;  $n = 4$  grey-brown mouse lemurs) were clean (fewer than 500  
408 sequences).

409

### 410 *AmpliSAS vs ACACIA: chicken optimal primers dataset*

411 When comparing the results of the ACACIA workflow with the expected genotypes, nine alleles  
412 dropped out, no false positives were found (Table 2) and allele calling accuracy was 98.5%. All  
413 instances of allele dropout derived from the B21 haplotype. For two genotypes, both BLB2\*21  
414 and BLB1\*21 dropped out. For four genotypes, only BLB1\*21 dropped out and for one  
415 genotype only BLB2\*21 dropped out (Table 2). Allele calling repeatability was 97.7%.

416 Using the optimal settings in AmpliSAS 17 alleles dropped out, one false positive was  
417 found (Table 2) and allele calling accuracy was 97% (Figure S1). As with ACACIA, most allele  
418 dropouts (16 of 17) derived from the B21 haplotype. For three genotypes, both BLB2\*21 and

419 BLB1\*21 dropped out. For nine genotypes, only BLB2\*21 alleles dropped out and for one  
420 genotype only BLB1\*21 allele dropped out. Finally for one genotype the allele dropout was  
421 BLB2\*04 and the same genotype had a false positive allele (Table 2). Allele calling repeatability  
422 was 95.5%.

423

#### 424 *AmpliSAS vs ACACIA: chicken naïve primers dataset*

425 Using ACACIA, we found 134 allele dropouts and allele calling accuracy was 77.9%. However,  
426 all dropouts were from the alleles BLB2\*04, BLB2\*15 or BLB2\*21, for which a primer  
427 mismatch was present. Therefore, all allele dropouts could be explained by primer design.  
428 Furthermore, allele calling repeatability between both replicates was 100%.

429       Using AmpliSAS, we found 149 allele dropouts and allele calling accuracy was 75.2%.  
430 As above, 134 dropouts were due to a mismatch with the forward primer. The remaining 15  
431 alleles that dropped out were BLB2\*12 or \*19 (11 alleles) and BLB1\*14 (4 alleles). Allele  
432 calling repeatability between both replicates was 98.3%.

433

#### 434 *ACACIA using wildlife species dataset: MHC Class I in grey-brown mouse lemurs*

435 Using ACACIA we were able to identify 279 exon 2 MHC Class I alleles in 147 grey-brown  
436 mouse lemur individuals. Allele calling repeatability was 99.6%, with only six individuals where  
437 an allele was called in only one of the two replicates.

438

#### 439 *Relationship between number of alleles amplified and artefacts*

440 The proportion of sequences classified as artefacts was much higher for PCRs using the optimal  
441 primer set than when using the naïve primer set (Figure 2a). For all chicken data sets, there is a

442 logarithmic relationship between the total proportion of artefacts and the number of alleles  
443 amplified (Figure 2a). However when considering non-chimeric artefacts, there was a positive  
444 relationship between the proportion of artefacts and the number of alleles amplified (Figure 2b).  
445 The proportion of chimeric reads no longer increased with number of alleles amplified when  
446 amplifying more than 4-6 alleles (Figure 2c). The total number of unique chimeric reads also  
447 tended to follow a logarithmic relationship, whereby the number of unique chimeric variants  
448 seemed to no longer increase with the number of alleles amplified when amplifying more than 10  
449 alleles (Figure 2d). The total number of parental variants generating chimeras also did not  
450 increase with CNV when amplifying more than six alleles (Figure 2e). Finally, the contribution  
451 of allelic variants to the proportion of reads decreased sharply with increasing number of alleles  
452 when amplifying less than 4-6 alleles (Figure 2f). However the contribution of allele variants to  
453 the proportion of reads stabilised when amplifying more than 4-6 alleles (Figure 2f). Both alleles  
454 from the B21 haplotype in the optimal dataset and the BLB1\*04 allele in the naïve dataset  
455 consistently amplified poorly when co-amplifying with alleles from other haplotypes (Figure 2f).

456         The proportion of chimeric artefacts was much smaller for the lemur dataset compared to  
457 the chicken datasets. The lemur dataset had few individuals with less than six alleles and no  
458 individuals with fewer than four alleles. Similarly to the chicken dataset, we observed a weak  
459 positive relationship between the total proportion of artefacts and the number of alleles amplified  
460 when amplifying more than 4-6 alleles (Figure 2a). However, the relationship between the  
461 proportion of non-chimeric artefacts and the number of alleles amplified was weaker than the  
462 chicken datasets (Figure 2b). In addition, the proportion of reads that were chimeric was much  
463 smaller for the lemur dataset than for chicken datasets (Figure 2c). The relationship between the

464 number of chimeric variants and the number of alleles amplified was similar to the chicken  
465 datasets (Figure 2d).

## 466 **Discussion**

467 Using known MHC genotypes for two datasets (chicken MHC Class II B complex), we achieved  
468 high allele calling accuracy (>98%) and repeatability (>97%) using ACACIA. With fewer allele  
469 dropouts and false positives, the ACACIA pipeline performed better than AmpliSAS. We  
470 additionally achieved very high allele calling repeatability (99.6%), when applying ACACIA to a  
471 wildlife species with a complex MHC class I system (grey-brown mouse lemur MHC Class I  
472 with a CNV of 4-21). We demonstrated the “costs” of designing primers within MHC exon 2 in  
473 terms of allele dropout, with three common alleles failing to amplify when using primers naïvely  
474 designed from sequences of related Galliform species. We also explored the relationship between  
475 artefacts and CNV, and found that surprisingly, the relationship between the proportion of  
476 chimeric artefacts and CNV was not linear but rather leveled when amplifying more than 4-6  
477 alleles. However, non-chimeric artefacts did increase linearly with increasing CNV. As expected  
478 we found heterogeneous amplification efficiency of allelic variants when amplifying multiple  
479 loci within a PCR. Below we discuss in further detail the AmpliSAS and ACACIA genotyping  
480 pipelines, primer design for non-model organisms, the relationship between CNV and artefacts,  
481 the effect of chimera formation on genotyping pipelines and, finally, we conclude by advising  
482 users on important points to consider when genotyping complex multigene systems in non-model  
483 organisms.

484

### 485 *AmpliSAS vs ACACIA*

486 Experimentally generating CNV of known chicken MHC Class II genotypes allowed us to  
487 validate our ACACIA pipeline to genotype systems with high CNV complexity at high accuracy  
488 and repeatability across replicates. While we achieved higher allele calling accuracy and

489 repeatability using ACACIA than the AmpliSAS web server pipeline, we do not claim that  
490 ACACIA will necessarily perform better than AmpliSAS with all datasets. To demonstrate the  
491 latter we would need to test both pipelines on a larger number of datasets and/or on simulated  
492 datasets. In addition, while our pipeline should suit data generated with any next-generation  
493 sequencing technologies, we have only tested ACACIA with paired-end Illumina sequencing  
494 technology.

495         The most apparent benefit of using the AmpliSAS web server is that it is relatively easy  
496 to use for users with limited knowledge of scripting languages (such as PYTHON, PERL, C++  
497 or R). However, we have noticed that a number of studies report using default settings when  
498 applying the AmpliSAS pipeline to their dataset. We find this concerning since, as our study  
499 demonstrates, the default clustering and filtering parameters are unlikely to be optimal for most  
500 datasets. Indeed, allele calling accuracy was much lower when using the default settings (81.8%)  
501 as compared to the optimal settings (97%) in the optimal primer dataset in our study, due to high  
502 allele dropout when using the default settings. We therefore strongly discourage users from using  
503 default settings and advise to permutate between different filtering and clustering parameters in  
504 order to find the best settings when using the AmpliSAS pipeline.

505         An important disadvantage of the AmpliSAS web server is that at the time of writing,  
506 sequencing depth per amplicon was limited to 5000 reads. The latter is particularly problematic  
507 when wishing to genotype systems with complex CNV, which require high sequencing depth to  
508 genotype with high repeatability (Biedrzycka et al., 2017). For datasets with sequencing depth  
509 above 5000 reads, AmpliSAS can be run locally but we found that, unlike the web server, the  
510 local version of AmpliSAS had limited documentation and troubleshooting was time consuming.



511           Once installed, ACACIA does not require users to have any understanding of scripting  
512 languages, allows genotyping with virtually unlimited sequencing depth and provides output data  
513 reporting the number of reads kept at each step of the pipeline. The latter should aid users when  
514 deciding upon optimal parameters and thresholds. As for the AmpliSAS pipeline, we advise to  
515 not use default parameters of ACACIA without critically assessing different parameters for each  
516 dataset. In particular, we urge users to permutate between different settings of *abs\_nor* and  
517 *low\_por* parameters.

518

### 519 *The challenge of designing primers for non-model organisms*

520 A common approach for primer design in complex genomic regions of non-model organisms  
521 includes downloading and aligning multiple sequences of phylogenetically related species. By  
522 building primers on consensus sequences, researchers hope that oligos will amplify the target  
523 region also in the species of interest. However, knowledge about related species is often limited  
524 to very few individuals. This means that, inevitably, primers can be designed in regions that are  
525 polymorphic in the target species. As a consequence, certain allelic variants are not amplified  
526 and homozygosity is overestimated. Indeed, this proved to be the case in our naïve primers  
527 dataset, whereby two mismatches (1st bp and 16th bp) within the forward primer (19 bp long)  
528 were sufficient to prevent the amplification of three alleles (out of 13). Interestingly, a single  
529 base pair mismatch between the second base pair of the reverse primer and the BLB1\*04 allele  
530 did not prevent the amplification of this allele, although it did suffer severely from low  
531 amplification efficiency when in competition with other alleles (Figure 2f). However, high  
532 sequencing depth for the naïve primer dataset prevented this allele from dropping out, regardless  
533 of the genotyping pipeline used. Our study therefore highlights the importance of designing

534 multiple primers when wishing to genotype a novel target region in non-model organisms to  
535 limit allele dropout due to primer mismatch.

536

537 *Relationship between number of alleles amplified and artefacts*

538 By knowing the exact alleles to expect for the chicken genotypes, we were able to quantify  
539 chimeric artefacts precisely (Figure 1). There was a higher proportion of chimeric and non-  
540 chimeric artefacts in the optimal primer dataset than in the naïve primer dataset. The most likely  
541 explanation for the latter is the shorter sequence for the naïve primer dataset (151 bp) compared  
542 to the optimal primer dataset (241 bp). A shorter fragment reduces the number of base pairs that  
543 can be erroneously substituted and the number of breaking points for chimera formation. In  
544 addition, it is likely that the probability of incomplete elongation is inversely related to fragment  
545 length. Thus, fragment length appears to be the dominant factor predicting the proportion of  
546 artefactual reads.

547 For the lemur dataset, PCR conditions were modified to avoid chimera formation. The  
548 extension step within PCR cycles was increased and the final extension step was omitted. Such  
549 modification to PCR cycles are recommended to reduce the number of chimeras when co-  
550 amplifying multiple loci, because most incomplete primer extensions which generate chimeras  
551 are thought to be formed during the final extension step (Judo et al., 1998; Lenz & Becker, 2008;  
552 Smyth et al., 2010). Our data further supports the latter, since the lemur dataset had a much  
553 smaller proportion of reads that were chimeras than the two chicken datasets.

554 As expected the proportion of reads that were non-chimeric artefacts increased linearly as  
555 CNV increased, which can be explained simply by the fact that there is an increasing number of  
556 possible artefacts that can be generated as the number of initial template variants increases. The

557 slower rate of increase in the number of artefacts with increasing CNV for the lemur dataset  
558 compared to the chicken data can again be explained by the modified PCR conditions for the  
559 lemur dataset mentioned previously. Thus, once again most reads that failed to be completely  
560 elongated within the PCR cycles are more likely to be erroneously elongated during the final  
561 extension step.

562 A more unexpected result was that the proportions of reads that were chimera did not  
563 increase with increasing CNV when amplifying more than 4-6 alleles. Similarly, when  
564 amplifying more than 10 alleles, the number of chimeric variants no longer increased with  
565 increasing CNV. Such saturation in chimera generation beyond a CNV threshold is likely to be a  
566 by-product of allele PCR competition. Indeed, as demonstrated by our own data (Figure 2f),  
567 there is amplification bias whereby some gene variants are amplified preferentially relative to  
568 others (Marmesat et al., 2016; Sommer, Courtiol, & Mazzone, 2013). Therefore, a few gene  
569 variants (~ 3-6 gene variants) are preferentially amplified and most chimeras originate from these  
570 dominantly amplified variants and few chimeras are generated from the poorly amplified  
571 variants. Indeed, we found that the number of parental variants generating chimeras in our  
572 dataset did not increase with increasing CNV when amplifying more than 4-6 alleles. The non-  
573 linear relationship between chimera generation and CNV have important implications when  
574 considering sequencing depth needed to accurately genotype complex multigene system. Below  
575 we discuss in further detail, the challenges of dealing with chimeras in genotyping pipelines.

576

### 577 *The challenge of dealing with chimeras in genotyping pipelines*

578 The formation of artificial chimeras during amplification is an important source of artefacts in  
579 amplicon sequencing projects (Lenz & Becker, 2008; Smyth et al., 2010), including those with

580 newer sequencing technologies (Laver et al., 2016). Chimeras are challenging to identify as  
581 artefacts because they resemble real alleles generated by recombination, particularly in multigene  
582 systems under high rates of interlocus genetic exchange (“concerted evolution”), which is  
583 common in many MHC systems (Reto et al., 2008; Reto et al., 2010; Edwards, Grahn, & Potts,  
584 1995; Gillingham et al., 2016; Hess & Edwards, 2002; Wittzell et al., 1999). Our results suggest  
585 that chimeras are more prevalent, harder to identify and potentially more reproducible across  
586 technical replicates than previously assumed. We expect the same to be true for similar projects  
587 with conserved, yet variable amplification targets such as the MHC.

588 For the optimal primer dataset, regardless of the genotyping pipeline used, allele dropout  
589 occurred in genotypes with high CNV (for ACACIA 8 out of 9 and for AmpliSAS 12 out of 14  
590 haplotypes had a CNV < 10). For all instances bar one, allele dropout were alleles from the B21  
591 haplotype which amplified poorly when CNV was greater than 6 (Figure 2f). Higher sequencing  
592 depth will reduce or even remove such allele dropout instances (Biedrzycka et al., 2017). Indeed  
593 for the naïve primer dataset, sequencing depth was twice as high, and there were no instances of  
594 allele dropout due to the ACACIA pipeline (all allele dropouts were due to primer mismatch).  
595 One allele erroneously called as a real variant (i.e. a false positive) by the AmpliSAS pipeline in  
596 the optimal primer dataset was actually a chimera between the BLB1\*21 and BLB2\*21 alleles.  
597 Furthermore, when using the AmpliSAS pipeline, 15 allele dropouts in the naïve primer dataset  
598 were due to erroneous assignment of real allelic variants as chimera artefacts. Indeed, the B  
599 BLB2\*12 or \*19 minor allele was identical to potential chimeric artefact sequences between  
600 BLB1\*14 (85 possible breakpoints) and any of the following alleles: BLB2\*04, BLB1\*15,  
601 BLB1\*19, BLB1\*21 or BLB2\*21 (Figure 3a). In addition, BLB1\*14 dropped out because it is

602 identical to a chimeric sequence between the BLB2\*02 minor and BLB2\*12 or \*19 alleles (33  
603 breakpoints; Figure 3b).

604 We have identified two factors which seemed to enhance chimera formation and  
605 challenge the distinction between artefact and real allelic variants. First, the combination of  
606 multiple real “parent” sequences can yield the same chimeras, as illustrated in our examples in  
607 Figure 3a and Figure 3b, whereby any breakpoint in the shaded areas leads to the same chimeras.  
608 Second, peripheral breakpoints (Figure 3c) can generate chimeric sequences that differ to  
609 parental sequences by as little as a single base pair. For instance, a chimera could be a product of  
610 the allele BLB1\*21 combined with any of the other alleles shown in the alignment, with a  
611 breakpoint within the shaded area (Figure 3c). Since the potential breaking points are at the very  
612 end of the sequence, the chimera is very similar to one of its parents (in this example, it is  
613 different from BLB1\*21 by only one base). In attempt to deal with this issue as much as  
614 possible, we changed the default settings of VSEARCH so that chimeras can be detected even if  
615 they differ from one parent by one single base. Both the “multiple parents” and the “peripheral  
616 breakpoints” issues are likely to contribute to making chimeras reproducible across replicates.

617

## 618 **Conclusion**

619 Genotyping accuracy and artefacts are intrinsically linked. We have demonstrated that the  
620 ACACIA genotyping pipeline provides high allele calling accuracy and repeatability. Regardless  
621 of the pipeline used, however, users should critically assess the optimal parameters to be used.  
622 We are convinced that universal default settings for optimal genotyping accuracy cannot be  
623 achieved, since optimal parameters will depend on dataset-specific generation of artefacts. The  
624 latter, in turn, varies according to species-specific CNV, DNA quality, and the conditions of PCR

625 (e.g. extension time, number of cycles and the polymerase used) and sequencing (e.g. quality and  
626 depth). High sequencing depth allows detecting alleles that amplify poorly in complex  
627 (multigene) systems. Furthermore simple steps prior to sequencing can greatly reduce the  
628 number of artefacts generated and improve genotyping accuracy: designing more than one PCR  
629 primer pair, reducing the number of PCR cycles, increasing PCR in-cycle extension time, and  
630 omitting the final extension step. Reducing chimera formation during PCRs is particularly  
631 critical, because they are difficult to distinguish from real alleles generated by inter-locus  
632 recombination.

633

#### 634 **Author contributions**

635 MG and PS conceived the study. PS designed ACACIA. MG did the data analysis in R. MG, PS  
636 and KM ran the allele calling workflows. KM did the AmpliSAS analysis and the lab work for  
637 the lemur samples. KW participated in and supervised the lab work. KG did the lab work for the  
638 chicken samples. SS instigated the study and heads the lab where the work was carried out. MG  
639 and PS wrote the first draft of the paper. All authors participated in the writing of the manuscript  
640 and contributed after the first version of the manuscript.

641

#### 642 **Data accessibility**

643 Raw sequences of all datasets are available in the NCBI Sequence Read Archive (SRA;  
644 accession number: X) under BioProject X. ACACIA is freely available on the GitLab at  
645 [https://gitlab.com/psc\\_santos/ACACIA](https://gitlab.com/psc_santos/ACACIA), under an MIT license.

646

#### 647 **Acknowledgments**

648 MG was supported by a DFG grant (DFG Gi 1065/2-1). We are very grateful to Jim Kaufman  
649 providing the chicken DNA samples used in this study and for his comments on a previous  
650 version of this work.

651

652 **References**

- 653 Altschul, S. F., Gish, W., Miller, W., Myers, E. W., & Lipman, D. J. (1990). Basic local alignment  
654 search tool. *Journal of Molecular Biology*, 215(3), 403–410. doi: 10.1016/S0022-  
655 2836(05)80360-2
- 656 Amir, A., McDonald, D., Navas-Molina, J. A., Kopylova, E., Morton, J. T., Xu, Z. Z., ... Knight, R.  
657 (2017). Deblur Rapidly Resolves Single-Nucleotide Community Sequence Patterns.  
658 *MSystems*, 2(2), e00191-16. doi: 10.1128/mSystems.00191-16
- 659 Averdam, A., Petersen, B., Rosner, C., Neff, J., Roos, C., Eberle, M., ... Walter, L. (2009). A  
660 Novel System of Polymorphic and Diverse NK Cell Receptors in Primates. *PLOS*  
661 *Genetics*, 5(10), e1000688. doi: 10.1371/journal.pgen.1000688
- 662 Babik, W. (2010). Methods for MHC genotyping in non-model vertebrates. *Molecular Ecology*  
663 *Resources*, 10(2), 237–251. doi: 10.1111/j.1755-0998.2009.02788.x
- 664 Biedrzycka, A., Sebastian, A., Migalska, M., Westerdahl, H., & Radwan, J. (2017). Testing  
665 genotyping strategies for ultra-deep sequencing of a co-amplifying gene family: MHC  
666 class I in a passerine bird. *Molecular Ecology Resources*, 17(4), 642–655. doi:  
667 10.1111/1755-0998.12612
- 668 Burri, R., Promerová, M., Goebel, J., & Fumagalli, L. (2014). PCR-based isolation of multigene  
669 families: lessons from the avian MHC class IIB. *Molecular Ecology Resources*, 14(4),  
670 778–788. doi: 10.1111/1755-0998.12234
- 671 Burri, Reto, Hirzel, H. N., Salamin, N., Roulin, A., & Fumagalli, L. (2008). Evolutionary patterns  
672 of MHC class II B in owls and their implications for the understanding of avian MHC  
673 evolution. *Molecular Biology and Evolution*, 25(6), 1180–91. doi:  
674 10.1093/molbev/msn065
- 675 Burri, Reto, Salamin, N., Studer, R. A., Roulin, A., & Fumagalli, L. (2010). Adaptive Divergence  
676 of Ancient Gene Duplicates in the Avian MHC Class II  $\beta$ . *Molecular Biology and*  
677 *Evolution*, 27(10), 2360–2374. doi: 10.1093/molbev/msq120



- 678 Callahan, B. J., McMurdie, P. J., Rosen, M. J., Han, A. W., Johnson, A. J. A., & Holmes, S. P.  
679 (2016). DADA2: High-resolution sample inference from Illumina amplicon data. *Nature*  
680 *Methods*, 13(7), 581–583. doi: 10.1038/nmeth.3869
- 681 Chen, J.-M., Cooper, D. N., Chuzhanova, N., Férec, C., & Patrinos, G. P. (2007). Gene  
682 conversion: mechanisms, evolution and human disease. *Nature Reviews Genetics*,  
683 8(10), 762–775. doi: 10.1038/nrg2193
- 684 Edwards, S., Grahn, M., & Potts, W. (1995). Dynamics of Mhc evolution in birds and  
685 crocodilians: amplification of class II genes with degenerate primers. *Molecular Ecology*,  
686 4, 719–729.
- 687 Eren, A. M., Maignien, L., Sul, W. J., Murphy, L. G., Grim, S. L., Morrison, H. G., & Sogin, M. L.  
688 (2013). Oligotyping: differentiating between closely related microbial taxa using 16S  
689 rRNA gene data. *Methods in Ecology and Evolution*, 4(12), 1111–1119. doi:  
690 10.1111/2041-210X.12114
- 691 Flügge, P., Zimmermann, E., Hughes, A. L., Günther, E., & Walter, L. (2002). Characterization  
692 and Phylogenetic Relationship of Prosimian MHC Class I Genes. *Journal of Molecular*  
693 *Evolution*, 55(6), 768–775. doi: 10.1007/s00239-002-2372-7
- 694 Galan, M., Guivier, E., Caraux, G., Charbonnel, N., & Cosson, J.-F. (2010). A 454 multiplex  
695 sequencing method for rapid and reliable genotyping of highly polymorphic genes in  
696 large-scale studies. *BMC Genomics*, 11(1), 296. doi: 10.1186/1471-2164-11-296
- 697 Gillingham, M. a. F., Courtiol, A., Teixeira, M., Galan, M., Bechet, A., & Cezilly, F. (2016).  
698 Evidence of gene orthology and trans-species polymorphism, but not of parallel  
699 evolution, despite high levels of concerted evolution in the major histocompatibility  
700 complex of flamingo species. *Journal of Evolutionary Biology*, 29(2), 438–454. doi:  
701 10.1111/jeb.12798
- 702 Glenn, T. C. (2011). Field guide to next-generation DNA sequencers. *Molecular Ecology*  
703 *Resources*, 11(5), 759–769. doi: 10.1111/j.1755-0998.2011.03024.x

- 704 Goto, R. M., Afanassieff, M., Ha, J., Iglesias, G. M., Ewald, S. J., Briles, W. E., & Miller, M. M.  
705 (2002). Single-strand conformation polymorphism (SSCP) assays for major  
706 histocompatibility complex B genotyping in chickens. *Poultry Science*, *81*(12), 1832–  
707 1841. doi: 10.1093/ps/81.12.1832
- 708 Hess, C., & Edwards, S. (2002). The evolution of the major histocompatibility complex in birds.  
709 *Bioscience*, *52*(5), 423–431.
- 710 Huse, S. M., Huber, J. A., Morrison, H. G., Sogin, M. L., & Welch, D. M. (2007). Accuracy and  
711 quality of massively parallel DNA pyrosequencing. *Genome Biology*, *8*(7), R143. doi:  
712 10.1186/gb-2007-8-7-r143
- 713 Jacob, J. P., Milne, S., Beck, S., & Kaufman, J. (2000). The major and a minor class II  $\beta$ -chain  
714 (B-LB ) gene flank the Tapasin gene in the B-F /B-L region of the chicken major  
715 histocompatibility complex. *Immunogenetics*, *51*(2), 138–147. doi:  
716 10.1007/s002510050022
- 717 Judo, M. S. B., Wedel, A. B., & Wilson, C. (1998). Stimulation and suppression of PCR-  
718 mediated recombination. *Nucleic Acids Research*, *26*(7), 1819–1825. doi:  
719 10.1093/nar/26.7.1819
- 720 Katoh, K., & Standley, D. M. (2013). MAFFT Multiple Sequence Alignment Software Version 7:  
721 Improvements in Performance and Usability. *Molecular Biology and Evolution*, *30*(4),  
722 772–780. doi: 10.1093/molbev/mst010
- 723 Kaufman, J, Jacob, J., Shaw, I., Walker, B., Milne, S., Beck, S., & Salomonsen, J. (1999). Gene  
724 organisation determines evolution of function in the chicken MHC. *Immunological*  
725 *Reviews*, *167*, 101–17.
- 726 Kaufman, J, Milne, S., Göbel, T. W., Walker, B. a, Jacob, J. P., Auffray, C., ... Beck, S. (1999).  
727 The chicken B locus is a minimal essential major histocompatibility complex. *Nature*,  
728 *401*(6756), 923–5. doi: 10.1038/44856

- 729 Kaufman, Jim, Völk, H., & Wallny, H.-J. (1995). A “Minimal Essential Mhc” and an  
730 “Unrecognized Mhc”: Two Extremes in Selection for Polymorphism. *Immunological*  
731 *Reviews*, 143(1), 63–88. doi: 10.1111/j.1600-065X.1995.tb00670.x
- 732 Kelley, J., Walter, L., & Trowsdale, J. (2005). Comparative genomics of major histocompatibility  
733 complexes. *Immunogenetics*, 56(10), 683–695. doi: 10.1007/s00251-004-0717-7
- 734 Laver, T. W., Caswell, R. C., Moore, K. A., Poschmann, J., Johnson, M. B., Owens, M. M., ...  
735 Weedon, M. N. (2016). Pitfalls of haplotype phasing from amplicon-based long-read  
736 sequencing. *Scientific Reports*, 6, 21746. doi: 10.1038/srep21746
- 737 Lenz, T. L., & Becker, S. (2008). Simple approach to reduce PCR artefact formation leads to  
738 reliable genotyping of MHC and other highly polymorphic loci — Implications for  
739 evolutionary analysis. *Gene*, 427(1), 117–123. doi: 10.1016/j.gene.2008.09.013
- 740 Lighten, J., Oosterhout, C., Paterson, I. G., McMullan, M., & Bentzen, P. (2014). Ultra-deep  
741 Illumina sequencing accurately identifies MHC class IIb alleles and provides evidence for  
742 copy number variation in the guppy (*Poecilia reticulata*). *Molecular Ecology Resources*,  
743 14(4), 753–767. doi: 10.1111/1755-0998.12225
- 744 Lighten, J., Oosterhout, C. van, & Bentzen, P. (2014). Critical review of NGS analyses for de  
745 novo genotyping multigene families. *Molecular Ecology*, 23(16), 3957–3972. doi:  
746 10.1111/mec.12843
- 747 Liu, Y., Keller, I., & Heckel, G. (2012). Breeding site fidelity and winter admixture in a long-  
748 distance migrant, the tufted duck (*Aythya fuligula*). *Heredity*, 109(2), 108–116. doi:  
749 10.1038/hdy.2012.19
- 750 Magoč, T., & Salzberg, S. L. (2011). FLASH: Fast Length Adjustment of Short Reads to Improve  
751 Genome Assemblies. *Bioinformatics*, btr507. doi: 10.1093/bioinformatics/btr507
- 752 Marmesat, E., Soriano, L., Mazzoni, C. J., Sommer, S., & Godoy, J. A. (2016). PCR Strategies  
753 for Complete Allele Calling in Multigene Families Using High-Throughput Sequencing  
754 Approaches. *PLOS ONE*, 11(6), e0157402. doi: 10.1371/journal.pone.0157402

- 755 McElroy, K. E., Luciani, F., & Thomas, T. (2012). GemSIM: general, error-model based  
756 simulator of next-generation sequencing data. *BMC Genomics*, *13*(1), 74. doi:  
757 10.1186/1471-2164-13-74
- 758 Miller, S. A., Dykes, D. D., & Polesky, H. F. (1988). A simple salting out procedure for extracting  
759 DNA from human nucleated cells. *Nucleic Acids Research*, *16*(3), 1215.
- 760 Nakamura, T., Yamada, K. D., Tomii, K., & Katoh, K. (2018). Parallelization of MAFFT for large-  
761 scale multiple sequence alignments. *Bioinformatics*, *34*(14), 2490–2492. doi:  
762 10.1093/bioinformatics/bty121
- 763 Nei, M., Gu, X., & Sitnikova, T. (1997). Evolution by the birth-and-death process in multigene  
764 families of the vertebrate immune system. *Proceedings of the National Academy of*  
765 *Sciences*, *94*(15), 7799–7806.
- 766 Nei, M., & Rooney, A. P. (2005). Concerted and Birth-and-Death Evolution of Multigene  
767 Families. *Annual Review of Genetics*, *39*, 121–152. doi:  
768 10.1146/annurev.genet.39.073003.112240
- 769 Parham, P., & Ohta, T. (1996). Population Biology of Antigen Presentation by MHC Class I  
770 Molecules. *Science*, *272*(5258), 67–74. doi: 10.1126/science.272.5258.67
- 771 Pavey, S. A., Sevellec, M., Adam, W., Normandeu, E., Lamaze, F. C., Gagnaire, P.-A., ...  
772 Bernatchez, L. (2013). Nonparallelism in MHCII $\beta$  diversity accompanies nonparallelism  
773 in pathogen infection of lake whitefish (*Coregonus clupeaformis*) species pairs as  
774 revealed by next-generation sequencing. *Molecular Ecology*, *22*(14), 3833–3849. doi:  
775 10.1111/mec.12358
- 776 Promerová, M., Babik, W., Bryja, J., Albrecht, T., Stuglik, M., & Radwan, J. (2012). Evaluation of  
777 two approaches to genotyping major histocompatibility complex class I in a passerine—  
778 CE-SSCP and 454 pyrosequencing. *Molecular Ecology Resources*, *12*(2), 285–292. doi:  
779 10.1111/j.1755-0998.2011.03082.x

- 780 Quail, M. A., Smith, M., Coupland, P., Otto, T. D., Harris, S. R., Connor, T. R., ... Gu, Y. (2012).  
781 A tale of three next generation sequencing platforms: comparison of Ion Torrent, Pacific  
782 Biosciences and Illumina MiSeq sequencers. *BMC Genomics*, *13*(1), 341. doi:  
783 10.1186/1471-2164-13-341
- 784 R Core Team. (2018). *R: A Language and Environment for Statistical Computing*. Retrieved  
785 from <https://www.R-project.org/>
- 786 Radwan, J., Zagalska-Neubauer, M., Cichoń, M., Sendekca, J., Kulma, K., Gustafsson, L., &  
787 Babik, W. (2012). MHC diversity, malaria and lifetime reproductive success in collared  
788 flycatchers. *Molecular Ecology*, *21*(10), 2469–2479. doi: 10.1111/j.1365-  
789 294X.2012.05547.x
- 790 Rognes, T., Flouri, T., Nichols, B., Quince, C., & Mahé, F. (2016). VSEARCH: a versatile open  
791 source tool for metagenomics. *PeerJ*, *4*, e2584. doi: 10.7717/peerj.2584
- 792 Ross, M. G., Russ, C., Costello, M., Hollinger, A., Lennon, N. J., Hegarty, R., ... Jaffe, D. B.  
793 (2013). Characterizing and measuring bias in sequence data. *Genome Biology*, *14*(5),  
794 R51. doi: 10.1186/gb-2013-14-5-r51
- 795 Rozen, S., & Skaletsky, H. (1999). Primer3 on the WWW for General Users and for Biologist  
796 Programmers. In S. Misener & S. A. Krawetz (Eds.), *Bioinformatics Methods and*  
797 *Protocols* (pp. 365–386). doi: 10.1385/1-59259-192-2:365
- 798 Scheel, B. M., Henke-von der Malsburg, J., Giertz, P., Rakotondranary, S. J., Hausdorf, B., &  
799 Ganzhorn, J. U. (2015). Testing the Influence of Habitat Structure and Geographic  
800 Distance on the Genetic Differentiation of Mouse Lemurs (*Microcebus*) in Madagascar.  
801 *International Journal of Primatology*, *36*(4), 823–838. doi: 10.1007/s10764-015-9855-z
- 802 Sebastian, A., Herdegen, M., Migalska, M., & Radwan, J. (2016). amplisas: a web server for  
803 multilocus genotyping using next-generation amplicon sequencing data. *Molecular*  
804 *Ecology Resources*, *16*(2), 498–510. doi: 10.1111/1755-0998.12453

- 805 Sepil, I., Moghadam, H. K., Huchard, E., & Sheldon, B. C. (2012). Characterization and 454  
806 pyrosequencing of Major Histocompatibility Complex class I genes in the great tit reveal  
807 complexity in a passerine system. *BMC Evolutionary Biology*, *12*(1), 68. doi:  
808 10.1186/1471-2148-12-68
- 809 Shaw, I., Powell, T. J., Marston, D. A., Baker, K., van Hateren, A., Riegert, P., ... Kaufman, J.  
810 (2007). Different evolutionary histories of the two classical class I genes BF1 and BF2  
811 illustrate drift and selection within the stable MHC haplotypes of chickens. *The Journal of*  
812 *Immunology*, *178*(9), 5744–5752.
- 813 Smyth, R. P., Schlub, T. E., Grimm, A., Venturi, V., Chopra, A., Mallal, S., ... Mak, J. (2010).  
814 Reducing chimera formation during PCR amplification to ensure accurate genotyping.  
815 *Gene*, *469*(1), 45–51. doi: 10.1016/j.gene.2010.08.009
- 816 Sommer, S., Courtiol, A., & Mazzoni, C. J. (2013). MHC genotyping of non-model organisms  
817 using next-generation sequencing: a new methodology to deal with artefacts and allelic  
818 dropout. *BMC Genomics*, *14*(1), 542. doi: 10.1186/1471-2164-14-542
- 819 Stutz, W. E., & Bolnick, D. I. (2014). Stepwise Threshold Clustering: A New Method for  
820 Genotyping MHC Loci Using Next-Generation Sequencing Technology. *PLOS ONE*,  
821 *9*(7), e100587. doi: 10.1371/journal.pone.0100587
- 822 Untergasser, A., Cutcutache, I., Koressaar, T., Ye, J., Faircloth, B. C., Remm, M., & Rozen, S.  
823 G. (2012). Primer3—new capabilities and interfaces. *Nucleic Acids Research*, *40*(15),  
824 e115–e115. doi: 10.1093/nar/gks596
- 825 Wallny, H.-J., Avila, D., Hunt, L. G., Powell, T. J., Riegert, P., Salomonsen, J., ... Kaufman, J.  
826 (2006). Peptide motifs of the single dominantly expressed class I molecule explain the  
827 striking MHC-determined response to Rous sarcoma virus in chickens. *Proceedings of*  
828 *the National Academy of Sciences of the United States of America*, *103*(5), 1434–1439.  
829 doi: 10.1073/pnas.0507386103
- 830 Wickham, H. (2016). *ggplot2: Elegant Graphics for Data Analysis*. Springer.

831 Wittzell, H., Bernot, A., Auffray, C., & Zoorob, R. (1999). Concerted evolution of two Mhc class II  
832 B loci in pheasants and domestic chickens. *Molecular Biology and Evolution*, 16(4), 479–  
833 490.

834  
835

836 **Figure 1:** Flow diagram of reads and sequences from two Illumina runs analysed with ACACIA.  
837 Blue bars correspond to filters, and the percentages given correspond to the sequences kept at  
838 each step for further analyses. The percentage given at the bottom for artefacts refers to the total  
839 amount of reads in the beginning of the process. (Fwd & Rev) raw forward and reverse reads;  
840 (Mrg) Paired-end read merger; (Prm) primer filter; (QC) quality control; (Sgt) Singleton  
841 removal; (Chm) chimera removal; (Blt) BLAST filter.

842

843 **Figure 2:** The relationship between the number of alleles amplified and: the total (chimeric +  
844 non-chimeric reads) proportions of reads that are artefacts (a.); the proportion of non-chimeric  
845 reads (b.); the proportion of chimeric reads (c.); the absolute number of chimeric variants (d.);  
846 the absolute number of parental variants generating chimeric reads (e.); and, the proportion of  
847 reads for each real allelic variant. The lemur dataset was excluded from (e.) because few  
848 individuals had fewer than 6 alleles and none had fewer than 4 (however like the chicken  
849 datasets the absolute number of parental variants generating chimeric reads also did not increase  
850 with increasing number of alleles amplified). All relationships were fitted with general additive  
851 model using the ggplot package (Wickham, 2016) in R (R Core Team, 2018) using a binomial  
852 distribution for (a.), (b.), (c.) and (f.), and a Poisson distribution corrected for over-dispersion for  
853 (d.) and (e.).

854

855

856 **Figure 3:** Three alignments with examples of sequences which can be classified as chimeras.

857 The points denote identity to the first sequence in each alignment, while the differences to it are

858 highlighted. The shaded areas indicate possible chimera-yielding breakpoints. (a) The allele

859 BLB2\*12 or \*19 could be a chimera of BLB1\*14 with any of the four other allele sequences

860 depicted, in a case of multiple potential parent pairs. (b) BLB1\*14 can be interpreted as a

861 chimera between BLB2\*12 or \*19 minor and BLB2\*02. (c) Actual chimeric sequence with

862 multiple potential parents and a peripheral breakpoint, which is therefore very similar to one of

863 its parents.

864

865 **Figure S1:** AmpliSAS accuracy and repeatability for the optimal primer chicken dataset at

866 different filtering thresholds (i.e. ‘minimum amplicon frequency’).



867 **Table 1:** The number of alleles per genotype, the number of  
868 genotypes with a certain number alleles and the number of  
869 amplicons with a certain number alleles (all genotypes were  
870 duplicated) for the chicken datasets used in this study. The  
871 list haplotypes used to artificially create the genotypes are  
872 listed in supplementary Table S1.

| <b>Number of alleles<br/>per genotype</b> | <b>Number of genotypes</b> | <b>Number of amplicons</b> |
|-------------------------------------------|----------------------------|----------------------------|
| 2                                         | 7                          | 14                         |
| 4                                         | 7                          | 14                         |
| 6                                         | 7                          | 14                         |
| 8                                         | 7                          | 14                         |
| 10                                        | 7                          | 14                         |
| 11                                        | 5                          | 10                         |
| 12                                        | 2                          | 4                          |
| 13                                        | 1                          | 2                          |
| <b>Total</b>                              | <b>43</b>                  | <b>86</b>                  |

873

874 **Table 2:** Genotypes with allele dropouts and false positives using ACACIA and AmpliSAS  
 875 (excluding allele dropout due to primer mismatch in the naïve primers dataset).

| Genotype                                                     | Replicate | Number of predicted alleles | Allele dropout using ACACIA | Allele dropout using AMPLISAS | False positive using AMPLISAS |
|--------------------------------------------------------------|-----------|-----------------------------|-----------------------------|-------------------------------|-------------------------------|
| <b>a. Chicken optimal primers dataset (BLB MHC Class II)</b> |           |                             |                             |                               |                               |
| B2-B4-B12-B14-B19-B21                                        | 1         | 11                          | BLB1*21                     | BLB1*21<br>BLB2*21            |                               |
| B4-B14-B15-B19-B21                                           | 1         | 10                          | BLB1*21                     | BLB2*21                       |                               |
|                                                              | 2         | 10                          | BLB1*21                     | BLB1*21                       |                               |
| B4-B15-B19-B21                                               | 1         | 8                           | BLB1*21                     | BLB2*21                       |                               |
| B2-B4-B12-B14-B15-B19-B21                                    | 1         | 13                          | BLB1*21                     | BLB1*21                       |                               |
|                                                              |           |                             | BLB2*21                     | BLB2*21                       |                               |
| B2-B4-B12-B14-B15-B21                                        | 1         | 12                          | BLB1*21                     | BLB1*21                       |                               |
|                                                              |           |                             | BLB2*21                     | BLB2*21                       |                               |
| B2-B12-B14-B15-B19-B21                                       | 1         | 11                          | BLB2*21                     |                               |                               |
| B2-B4-B12-B15-B19-B21                                        | 1         | 11                          |                             | BLB2*21                       |                               |
| B2-B4-B12-B15-B21                                            | 1         | 10                          |                             | BLB2*21                       |                               |
| B2-B4-B14-B15-B19-B21                                        | 1         | 12                          |                             | BLB2*21                       |                               |
| B2-B4-B14-B15-B21                                            | 1         | 10                          |                             | BLB2*21                       |                               |
| B2-B4-B15-B19-B21                                            | 1         | 10                          |                             | BLB2*21                       |                               |
|                                                              | 2         | 10                          |                             | BLB2*21                       |                               |
| B4-B12-B21                                                   | 1         | 6                           |                             | BLB2*04                       | 1 false positive              |
| B4-B14-B15-B19-B21                                           | 2         | 10                          |                             | BLB2*21                       |                               |
| <b>b. Chicken naïve primers dataset (BLB MHC Class II)</b>   |           |                             |                             |                               |                               |
| B12-B14-B15-B21                                              | 1         | 5                           |                             | BLB2*12 or *19                |                               |
|                                                              | 2         | 5                           |                             | BLB2*12 or *19                |                               |
| B2-B12-B14-B15                                               | 1         | 6                           |                             | BLB2*12 or *19                |                               |
|                                                              | 2         | 6                           |                             | BLB2*12 or *19                |                               |
| B2-B14-B15-B19-B21                                           | 1         | 7                           |                             | BLB1*14                       |                               |
| B2-B4-B12-B14-B15                                            | 1         | 7                           |                             | BLB2*12 or *19                |                               |
|                                                              | 2         | 7                           |                             | BLB2*12 or *19                |                               |
| B2-B4-B12-B14-B15-B19                                        | 1         | 8                           |                             | BLB1*14                       |                               |
| B2-B4-B12-B14-B15-B19-B21                                    | 1         | 9                           |                             | BLB1*14                       |                               |
| B2-B4-B12-B14-B15-B21                                        | 1         | 8                           |                             | BLB2*12 or *19                |                               |
| B2-B4-B12-B14-B19-B21                                        | 1         | 8                           |                             | BLB1*14                       |                               |
| B4-B12-B14-B15                                               | 1         | 5                           |                             | BLB2*12 or *19                |                               |
|                                                              | 2         | 5                           |                             | BLB2*12 or *19                |                               |
| B4-B14-B15-B19-B21                                           | 1         | 6                           |                             | BLB2*12 or *19                |                               |
|                                                              | 2         | 6                           |                             | BLB2*12 or *19                |                               |

876

877

878 **Table S1:** The chicken MHC *B* complex haplotypes and combined  
 879 haplotypes which formed experimental genotypes with varying  
 880 copy number variation (CNV).

| Combined haplotypes       | Number of alleles |
|---------------------------|-------------------|
| B2                        | 2                 |
| B4                        | 2                 |
| B12                       | 2                 |
| B14                       | 2                 |
| B15                       | 2                 |
| B19                       | 2                 |
| B21                       | 2                 |
| B2-B4                     | 4                 |
| B2-B12                    | 4                 |
| B4-B12                    | 4                 |
| B12-B14                   | 4                 |
| B12-B21                   | 4                 |
| B14-B15                   | 4                 |
| B19-B21                   | 4                 |
| B2-B4-B19                 | 6                 |
| B2-B14-B19                | 6                 |
| B2-B15-B19                | 6                 |
| B4-B12-B21                | 6                 |
| B4-B14-B19                | 6                 |
| B12-B14-B21               | 6                 |
| B15-B19-B21               | 6                 |
| B2-B4-B12-B14             | 8                 |
| B2-B12-B14-B15            | 8                 |
| B2-B14-B19-B21            | 8                 |
| B4-B12-B14-B15            | 8                 |
| B4-B15-B19-B21            | 8                 |
| B12-B14-B15-B21           | 8                 |
| B14-B15-B19-B21           | 8                 |
| B2-B4-B12-B14-B15         | 10                |
| B2-B4-B12-B14-B21         | 10                |
| B2-B4-B12-B15-B21         | 10                |
| B2-B4-B14-B15-B21         | 10                |
| B2-B4-B15-B19-B21         | 10                |
| B2-B14-B15-B19-B21        | 10                |
| B4-B14-B15-B19-B21        | 10                |
| B2-B4-B12-B14-B15-B19     | 11                |
| B2-B4-B12-B14-B15-B21     | 12                |
| B2-B4-B12-B14-B19-B21     | 11                |
| B2-B4-B12-B15-B19-B21     | 11                |
| B2-B4-B14-B15-B19-B21     | 12                |
| B2-B12-B14-B15-B19-B21    | 11                |
| B4-B12-B14-B15-B19-B21    | 11                |
| B2-B4-B12-B14-B15-B19-B21 | 13                |



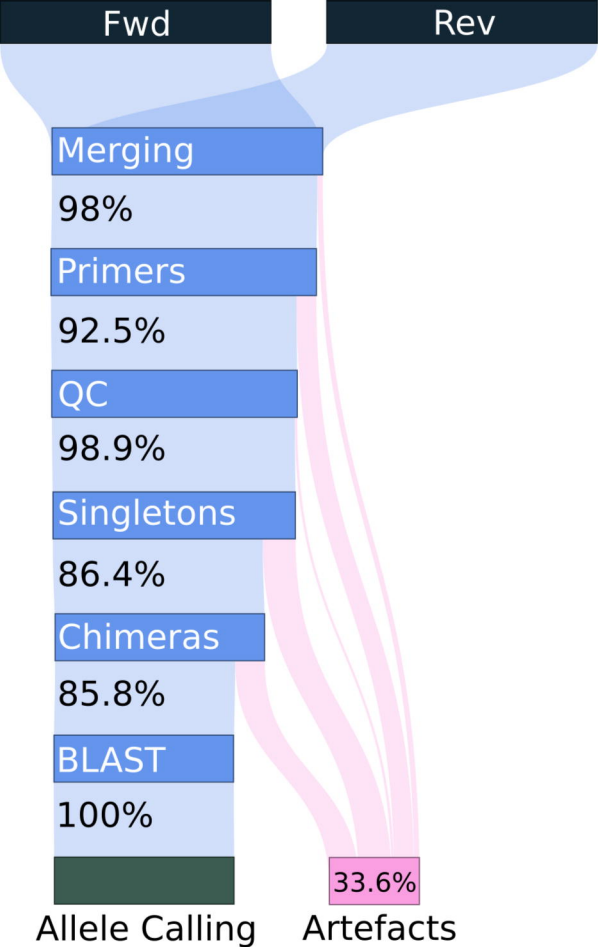

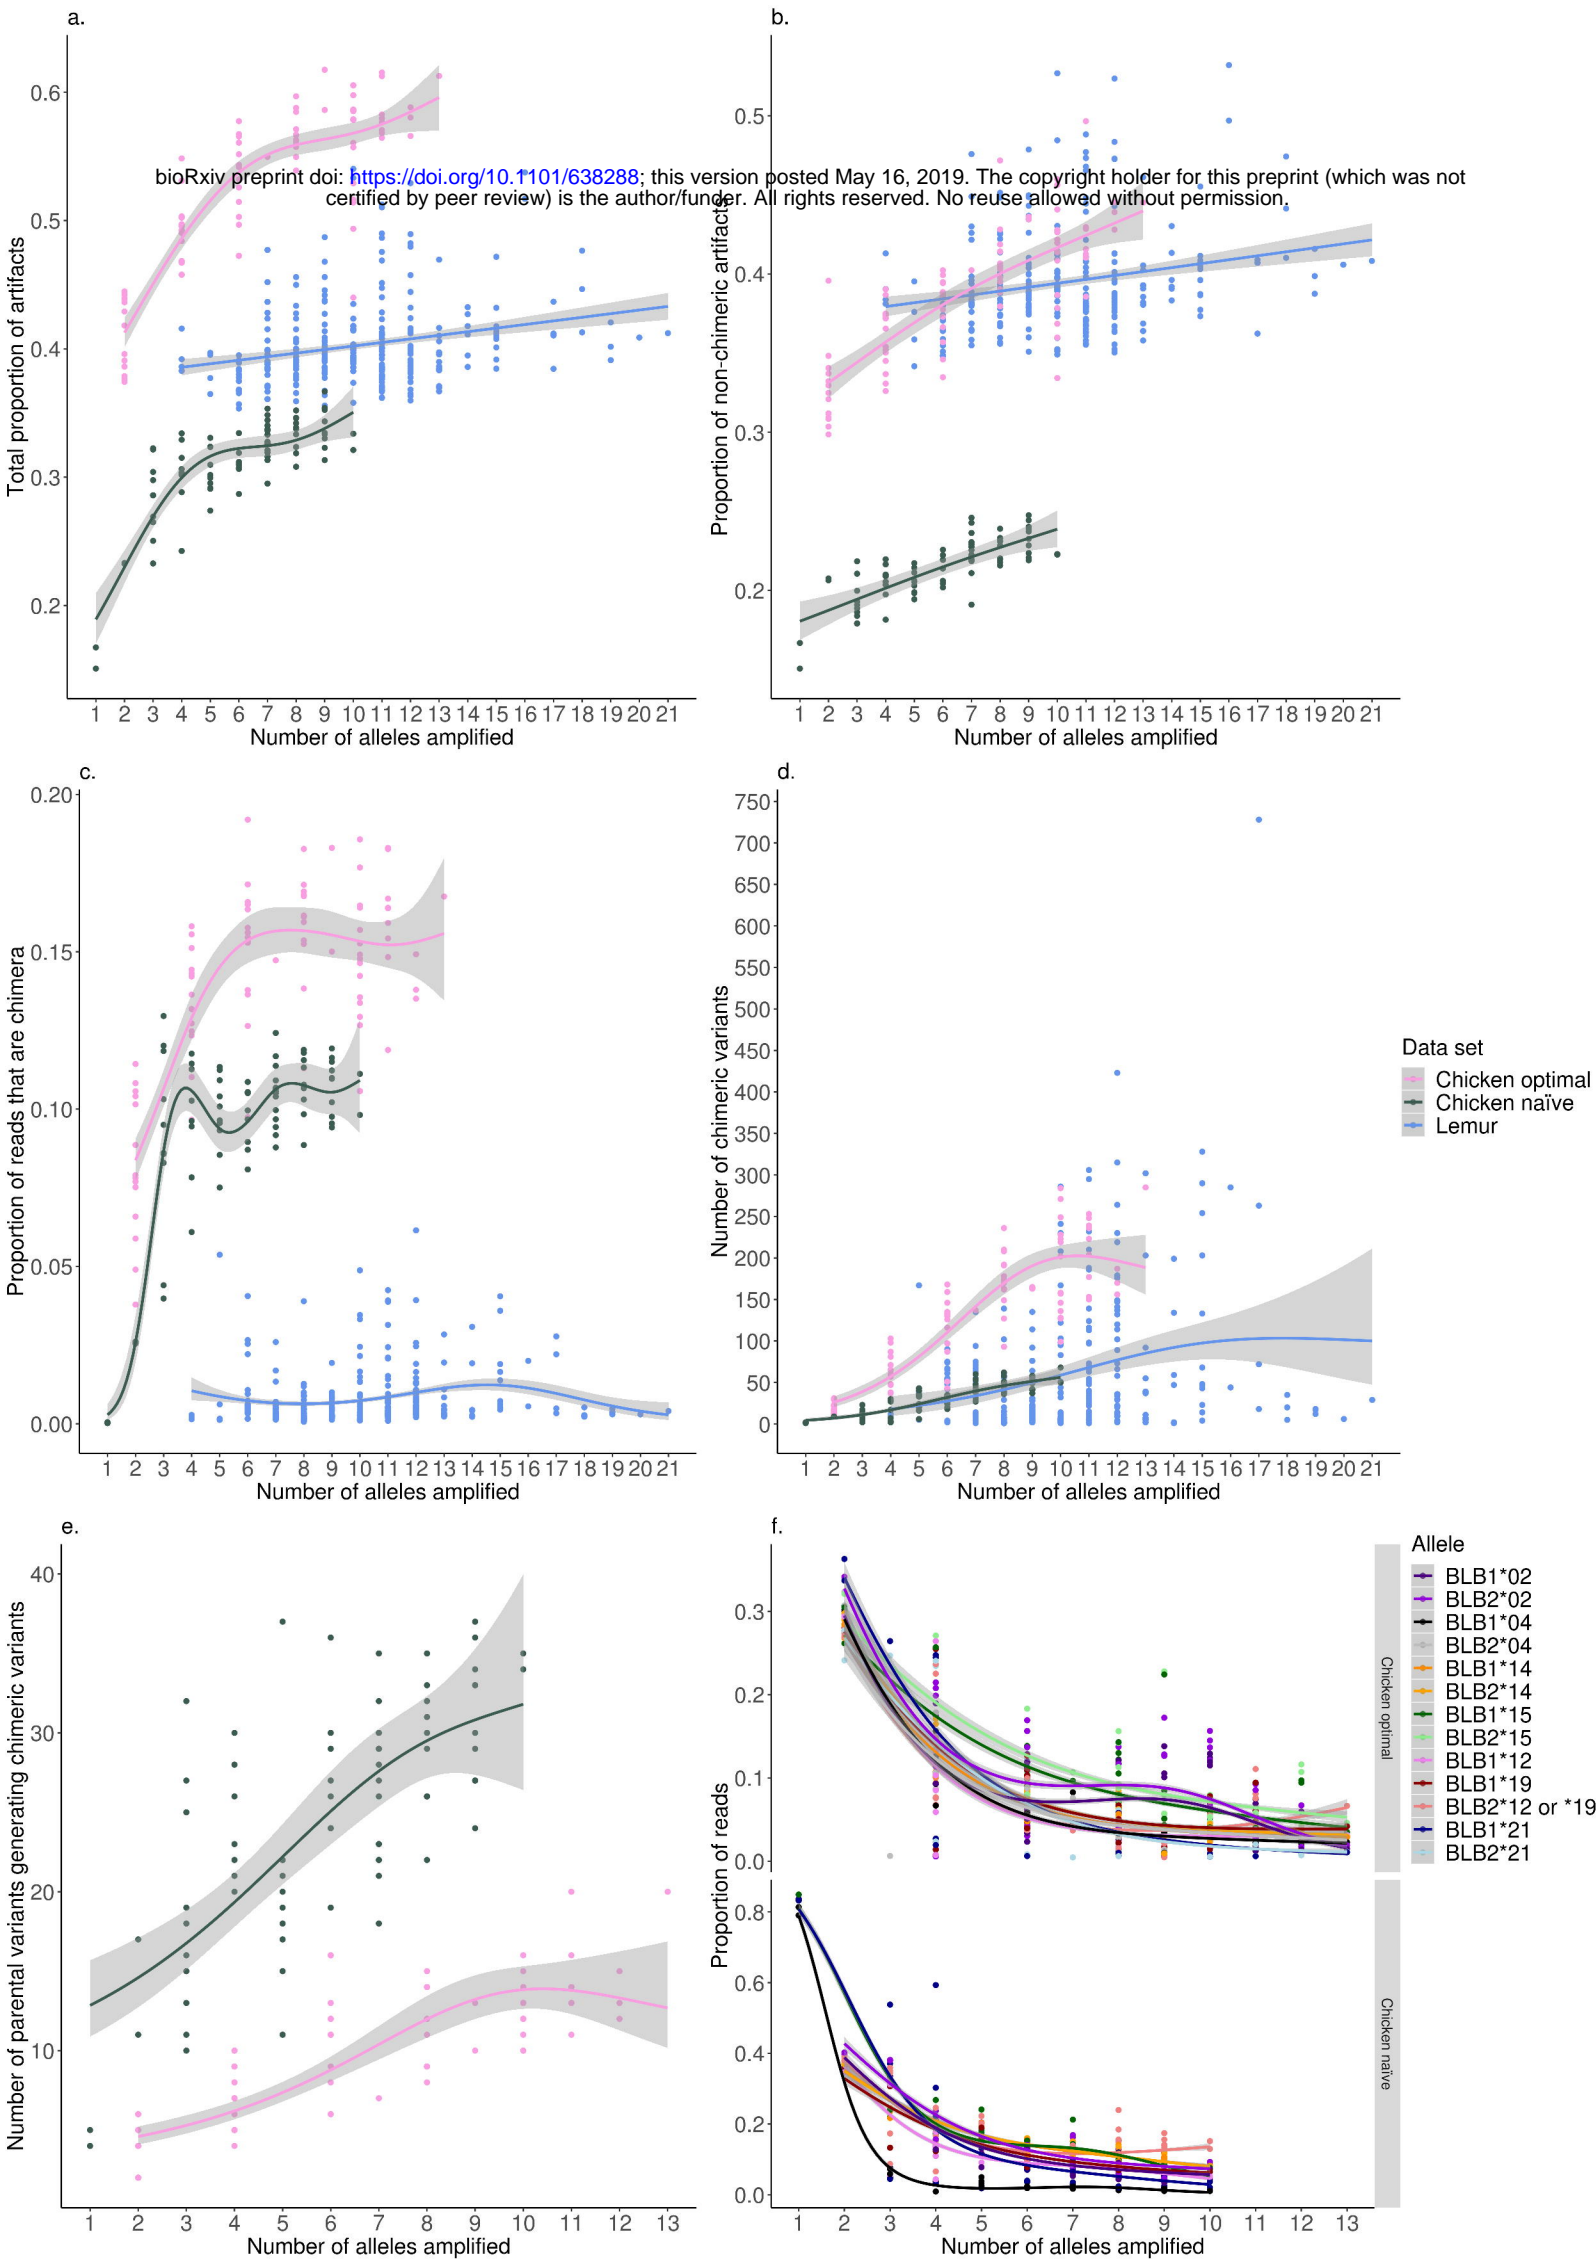

**a**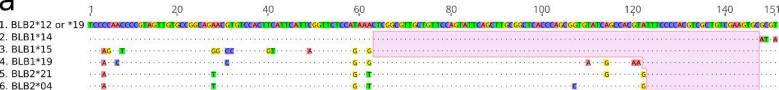**b**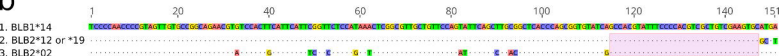**c**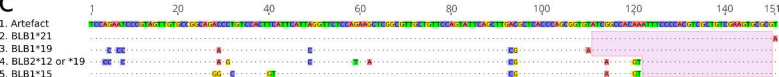

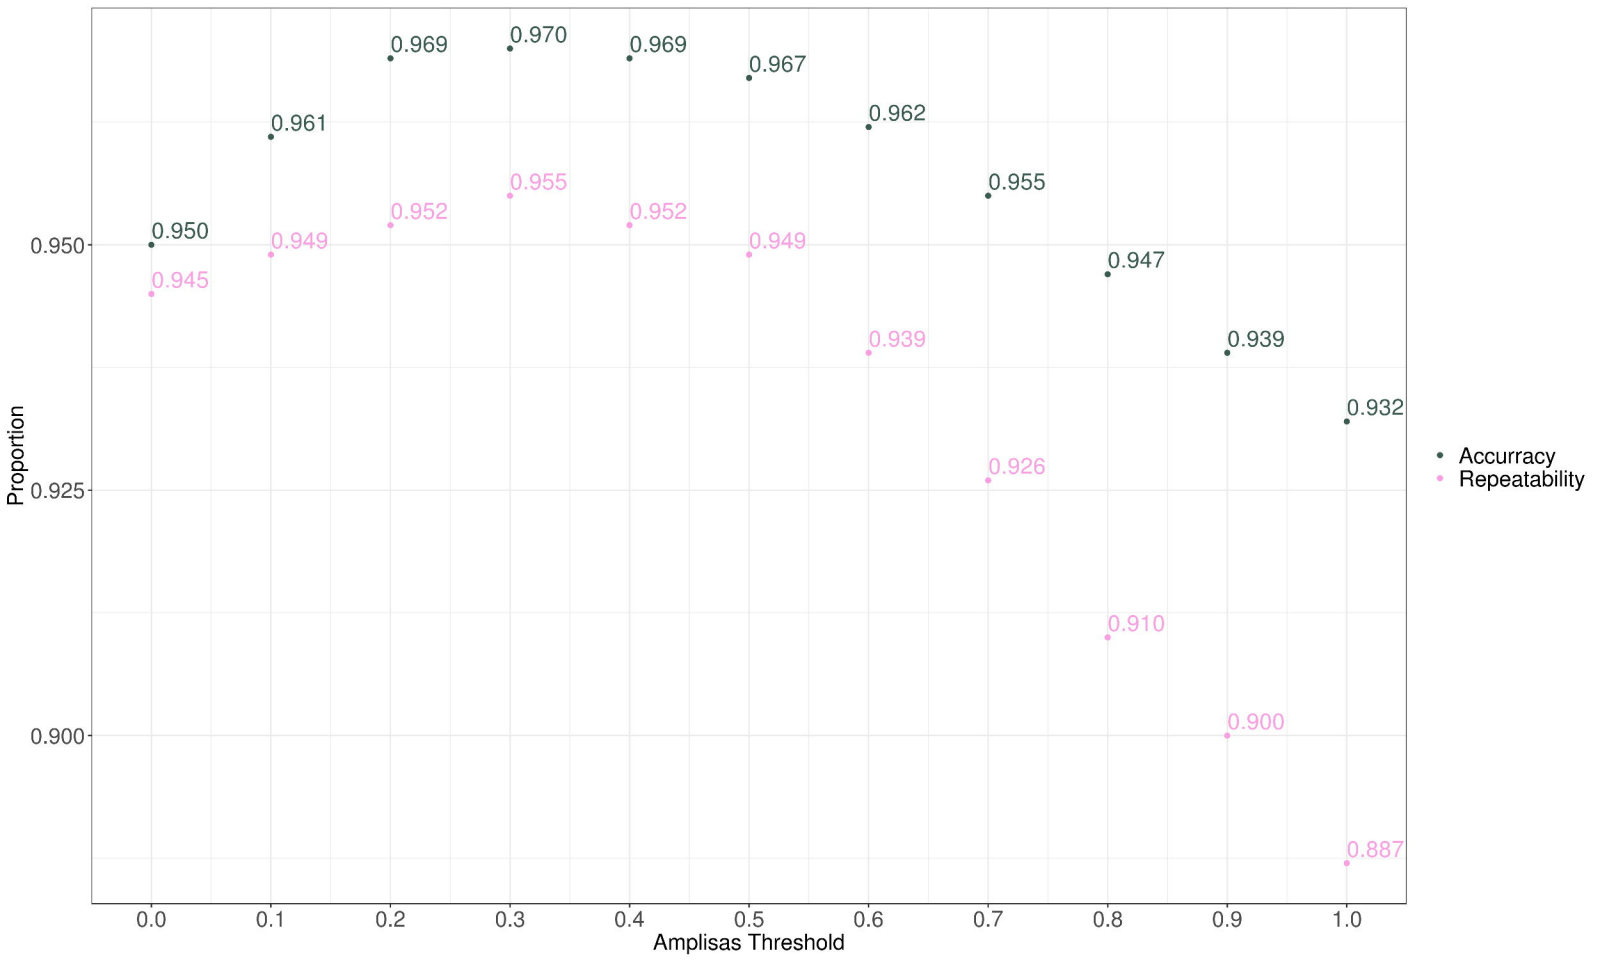

Source: https://www.biorxiv.org/content/10.1101/638288v1.full.pdf
